# Supplementary material
Source: MDPI journal article supplement (https://www.mdpi.com/2073-4441/10/6/741)
Supplement: s1 [file s1]

## Sheet: Sheet1
	Sensor	Resolution	Accuracy
Air temperature	ONSET S-THB-M002	0.02°C	± 0.21°C
Relative Humidity	ONSET S-THB-M002	0.1%	± 2.5%
Wind Speed	ONSET S-WSB-M003	0.5 m/s	±1.1m/s
Surface temperature	IR-Thermometer TESTO 830-T2	0.1 °C	± 0.5 °C
